# Supplementary material
Source: Springer Nature journal article supplement (https://www.springermedizin.de/resource/supplementary/12885_2011_3098_MOESM12_ESM.pdf/9463230)

**A**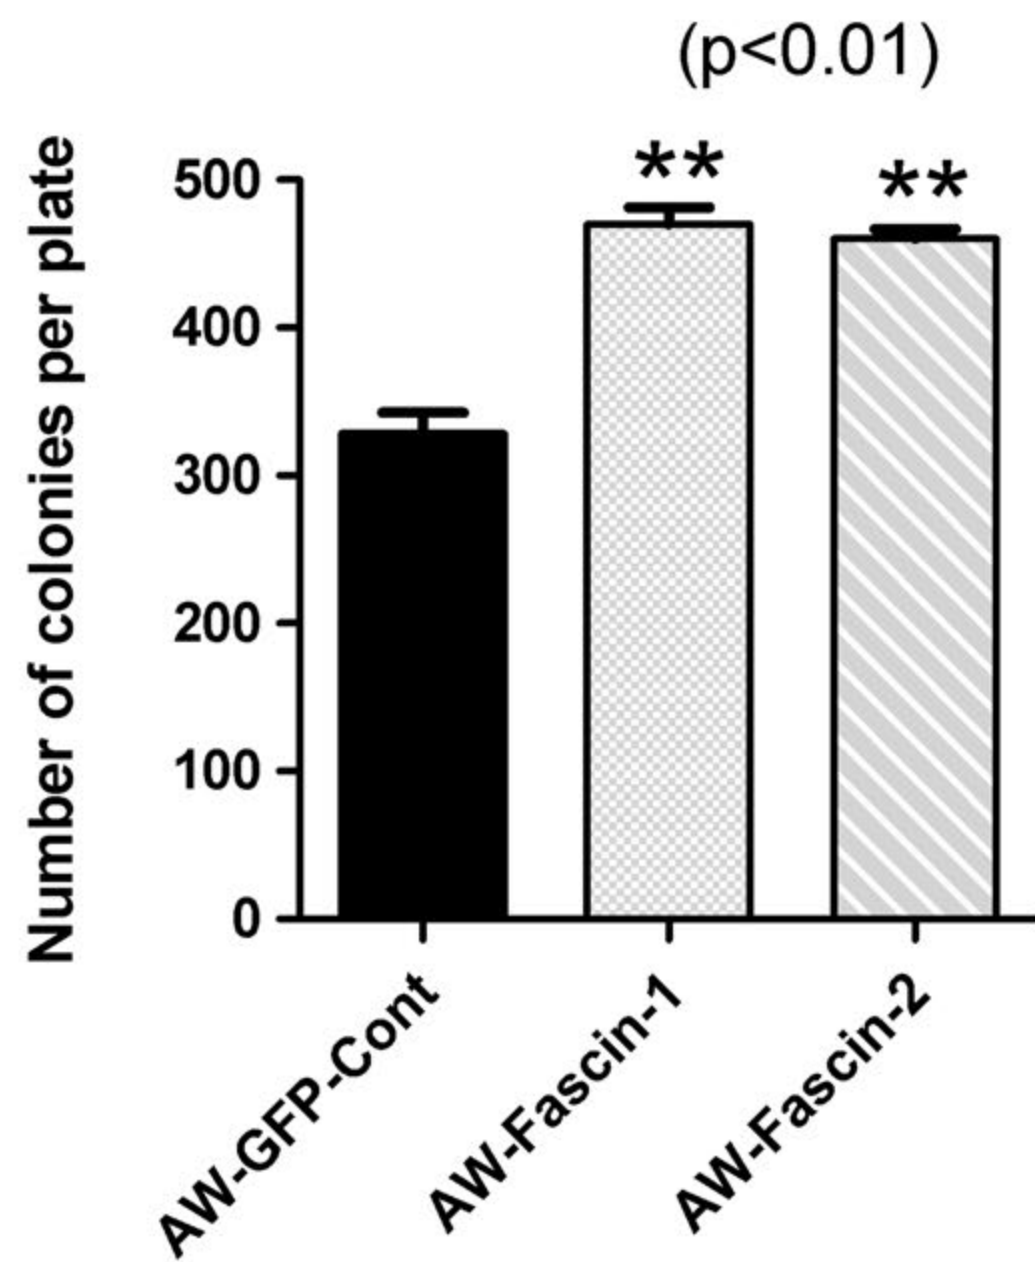**B**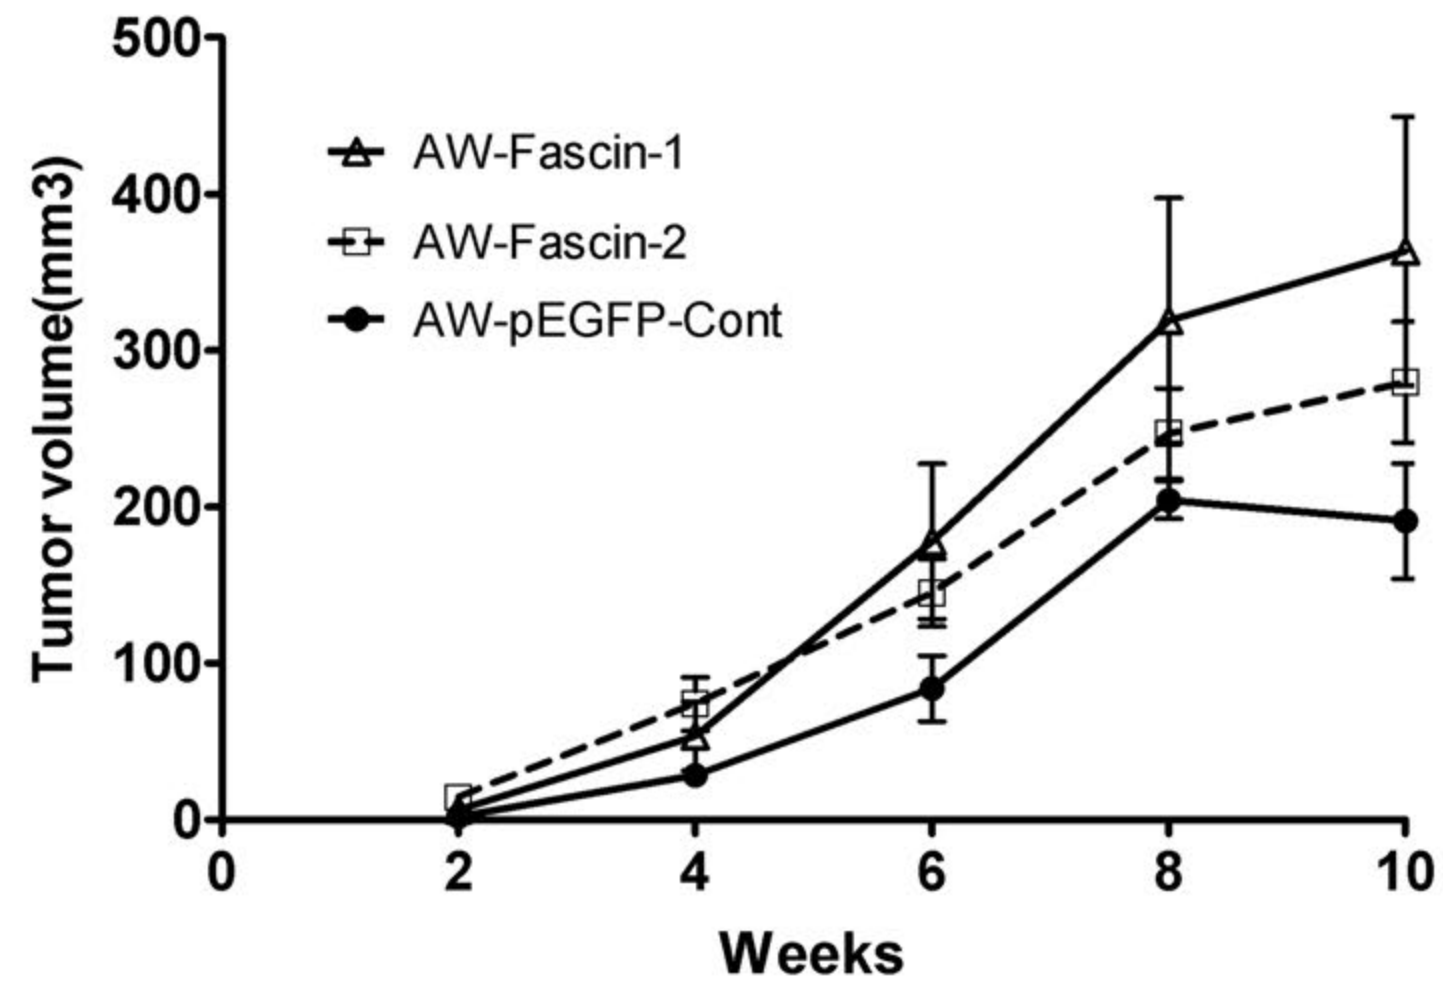**C**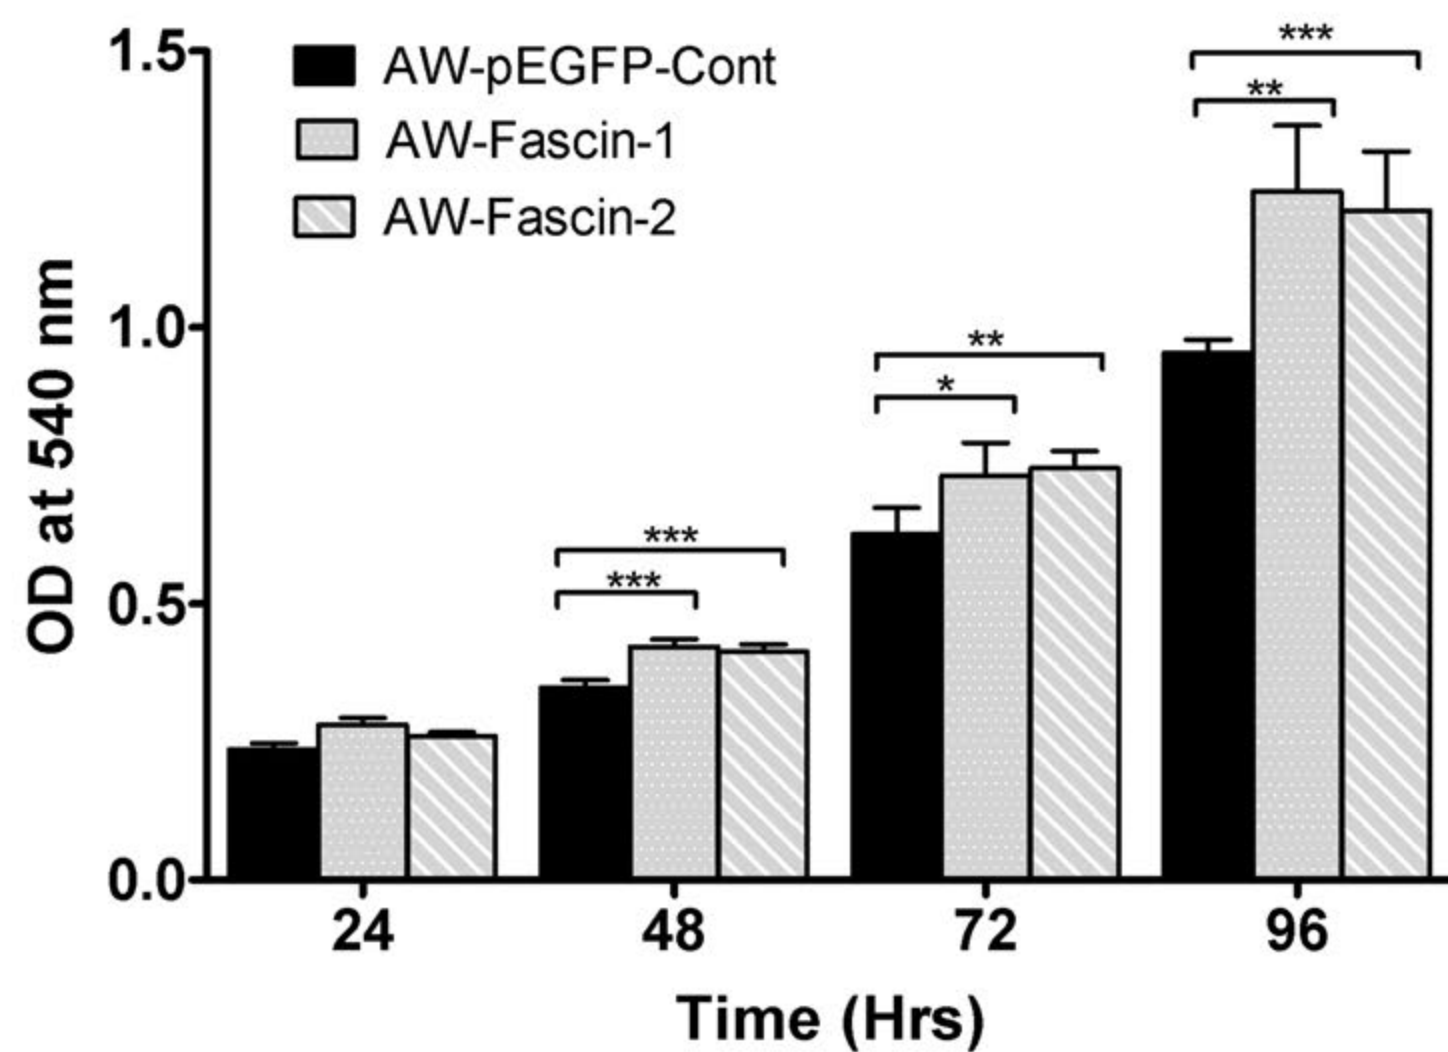**D**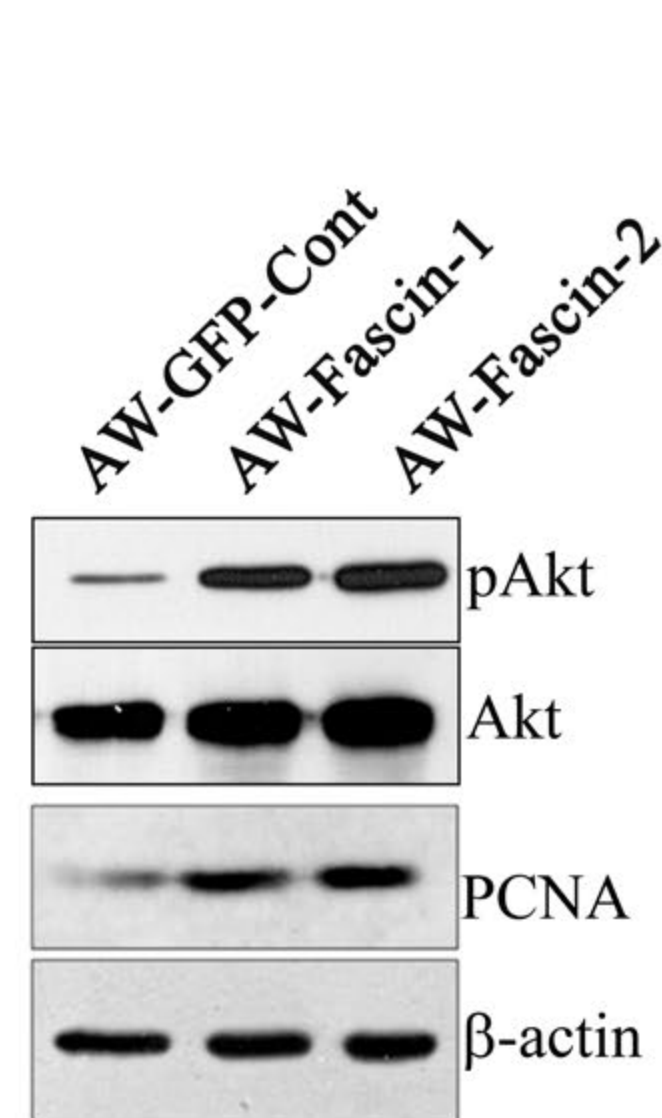**E**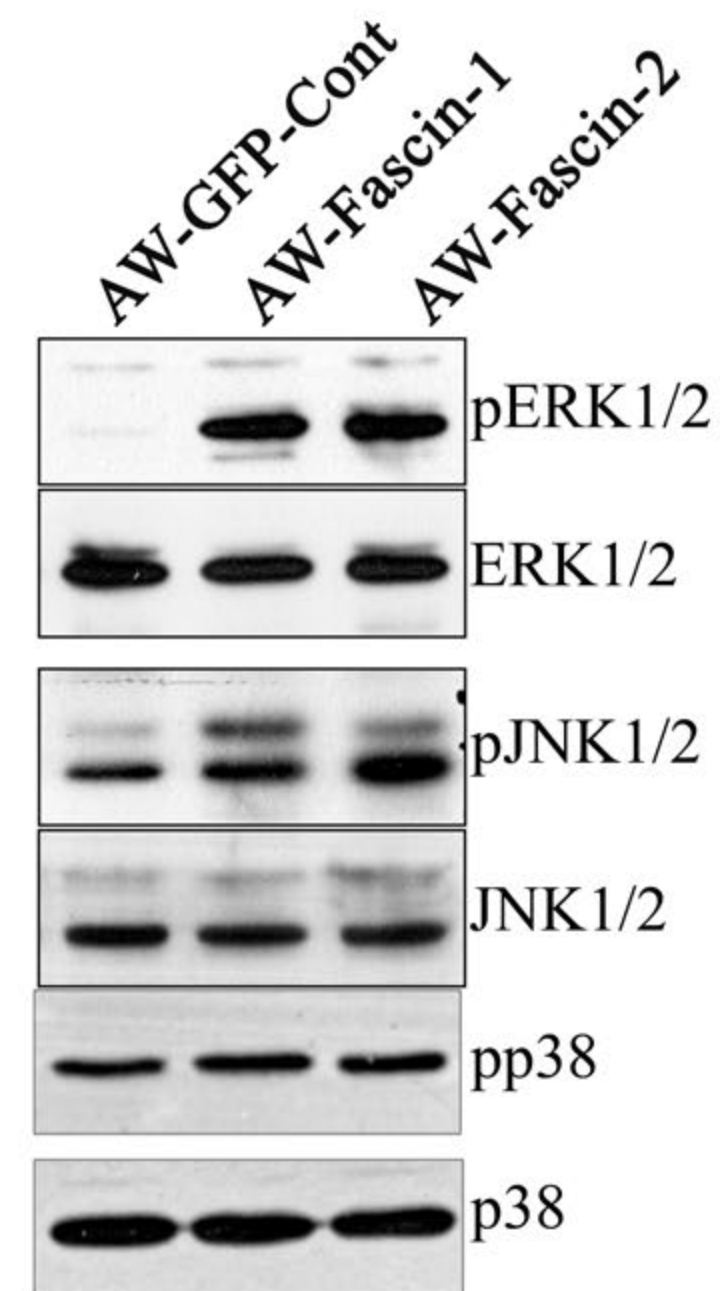

Supplement: MOESM12 [file 9463230]
